# Supplementary material for: Ionizing radiation induces endothelial transdifferentiation of glioblastoma stem-like cells through the Tie2 signaling pathway
Source: PubMed Central journal article supplement (PMC6817826; doi:10.1038/s41419-019-2055-6), 2019-10-28
Supplement: 41419_2019_2055_MOESM4_ESM.pdf [file 41419_2019_2055_MOESM4_ESM.pdf]

Please complete the table below to indicate the contributions of all named authors to the figures.

Figure 1:

|  |
|--|
|  |
|--|

Figure 2:

|  |
|--|
|  |
|--|

Figure 3:

|  |
|--|
|  |
|--|

Figure 4:

|  |
|--|
|  |
|--|

Figure 5:

|  |
|--|
|  |
|--|

Figure 6:

|  |
|--|
|  |
|--|

Signed for and on behalf of the Author(s):

|  |
|--|
|  |
|--|

Print Name:

|  |
|--|
|  |
|--|

Date:

|  |
|--|
|  |
|--|
